RESEARCH ARTICLE

# Application of a Hybrid Forest Growth Model to Evaluate Climate Change Impacts on Productivity, Nutrient Cycling and Mortality in a Montane Forest Ecosystem

Brad Seely<sup>1\*</sup>, Clive Welham<sup>1</sup>, Kim Scoullar<sup>2</sup>

**1** Department of Forest Resources Management, University of British Columbia, Vancouver, British Columbia, Canada, **2** Life Sciences Programming Incorporated, Naramata, British Columbia, Canada

\* [brad.seely@ubc.ca](mailto:brad.seely@ubc.ca)

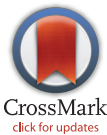

**OPEN ACCESS**

**Citation:** Seely B, Welham C, Scoullar K (2015) Application of a Hybrid Forest Growth Model to Evaluate Climate Change Impacts on Productivity, Nutrient Cycling and Mortality in a Montane Forest Ecosystem. PLoS ONE 10(8): e0135034. doi:10.1371/journal.pone.0135034

**Editor:** Lucas C.R. Silva, University of California Davis, UNITED STATES

**Received:** April 10, 2015

**Accepted:** July 16, 2015

**Published:** August 12, 2015

**Copyright:** © 2015 Seely et al. This is an open access article distributed under the terms of the [Creative Commons Attribution License](https://creativecommons.org/licenses/by/4.0/), which permits unrestricted use, distribution, and reproduction in any medium, provided the original author and source are credited.

**Data Availability Statement:** All relevant data are within the paper and its Supporting Information files.

**Funding:** This study was supported by the Future Forest Ecosystems Scientific Council (FFESC) of British Columbia ([https://www.for.gov.bc.ca/hfp/future\\_forests/council/index.htm](https://www.for.gov.bc.ca/hfp/future_forests/council/index.htm)) (to BS), Cumulative Environmental Management Association (CEMA) of Alberta, Canada (<http://www.cemaonline.ca/index.php/about-us>) (to CW), Alberta Environment (<http://esrd.alberta.ca/>) (to CW), Life Sciences Programming (to KS). Other than Life Sciences Programming, the funders had no role in study design, data collection

## Abstract

Climate change introduces considerable uncertainty in forest management planning and outcomes, potentially undermining efforts at achieving sustainable practices. Here, we describe the development and application of the FORECAST Climate model. Constructed using a hybrid simulation approach, the model includes an explicit representation of the effect of temperature and moisture availability on tree growth and survival, litter decomposition, and nutrient cycling. The model also includes a representation of the impact of increasing atmospheric CO<sub>2</sub> on water use efficiency, but no direct CO<sub>2</sub> fertilization effect. FORECAST Climate was evaluated for its ability to reproduce the effects of historical climate on Douglas-fir and lodgepole pine growth in a montane forest in southern British Columbia, Canada, as measured using tree ring analysis. The model was subsequently used to project the long-term impacts of alternative future climate change scenarios on forest productivity in young and established stands. There was a close association between predicted sapwood production and measured tree ring chronologies, providing confidence that model is able to predict the relative impact of annual climate variability on tree productivity. Simulations of future climate change suggest a modest increase in productivity in young stands of both species related to an increase in growing season length. In contrast, results showed a negative impact on stemwood biomass production (particularly in the case of lodgepole pine) for established stands due to increased moisture stress mortality.

## Introduction

Worldwide, forest health and productivity are being affected by anthropogenic climate change. The frequency and intensity of catastrophic natural disturbance agents, for example, are rising [1–4]. Moreover, evidence suggests that unusually severe drought events have triggered a significant rise in mortality rates in forested regions throughout the world [5, 6]. Climate change is expected to influence long-term forest productivity through its effect on moisture availability

and analysis, decision to publish, or preparation of the manuscript. Life Sciences Programming, on the other hand, provided support in the form of salaries for author KS, but did not have any additional role in the study design, data collection and analysis, decision to publish, or preparation of the manuscript. The specific roles of the authors are articulated in the 'author contributions' section.

**Competing Interests:** One of the authors (KS) is employed by Life Sciences Programming, Inc. This does not alter the authors' adherence to PLOS ONE policies on sharing data and materials.

[7, 8], temperature-limited net photosynthetic rates [9, 10] and nutrient cycling [11]. After litter quality, temperature and soil moisture are the key determinants of heterotrophic respiration and nutrient mineralization rates in temperate forests [12, 13].

Efforts at modeling the impact of climate on forests can be divided into three broad categories: dynamic global vegetation models (DGVMs), statistical models derived from climate envelope analysis, and stand-level, process-based models. The overall objective of DGVMs is to evaluate the influence of climate on the biogeochemical and hydrological processes regulating vegetation growth dynamics [14]. Although they can be detailed with respect to process simulation, these models are designed to predict general patterns of vegetation development over large spatial and temporal scales [15] and have limited application for evaluating alternative forest adaptation strategies (see, for example, [16]). In general, DGVMs may be best suited to evaluating the impact of changing climate regimes on regional patterns of forest productivity and hydrology.

Models based on the climate envelope approach rely on detailed statistical analyses of historical climate data collected from a species' observed range. Deviations from climate normals are calculated for future climate scenarios and then used to project changes in growth rates, mortality, and species distributions. Examples include a modified version of the Forest Vegetation Simulator (FVS) model [17], and adjustments to site index based on anticipated changes in growing-degree days [18]. The strength of this approach is that it provides a method for predicting climate change impacts with relatively small calibration data requirements. Challenges with the approach include, 1) limited insight with respect to the underlying mechanisms of response, 2) an assumption that current species distributions are dictated exclusively by climate, and 3) the issue that if the range of variation in future climate exceeds the historical climate regime then applications of the model are beyond the scope of its statistical foundations.

The third category of model is the stand-level, process-based models. These models employ physiological and physical principles in conjunction with simulated edaphic conditions to project forest development and productivity under a changing climate. They vary widely in their complexity and application, from comprehensive, research-oriented ecosystem models (e.g. Ecosys; [19]) to less complex, management-oriented models such as CABALA [20] to relatively simplified models designed for broad application such as 3PG [21]. The more complex models can be difficult to calibrate because they usually comprise many site and species-specific parameters. This can necessitate expensive, multi-year field research programs to support their application (e.g. [20]). Highly simplified process models usually have lower calibration requirements but they often cannot adequately address the complexity of forest management in the face of climate change. A compromise approach is embodied in 'hybrid' process-based models, in which empirical data inputted to the model are used to 'self-calibrate' at least some of the algorithm parameters associated with ecosystem processes (see [22]). This makes it possible to retain adequate model complexity while minimizing the calibration load [23].

Climate change introduces considerable uncertainty into forest management planning and outcomes, potentially undermining efforts at achieving sustainable practices [24, 25]. There is a need for models capable of projecting the potential impact of climate change on long-term patterns of forest growth and development while being reasonably accessible to forest managers. Ideally, such models should: 1) be capable of representing the effects of climate change on forest productivity and drought-related mortality, 2) include the ability to simulate a variety of forest management options to allow for an evaluation of adaptive management strategies, 3) provide broad outputs relevant to multi-objective forest management, and 4) be relatively straightforward to calibrate.

Here we describe the development and application of the hybrid simulation model FORECAST Climate. The model is evaluated with respect to its ability to reproduce the effects of

historic annual climate variability on the annual variation of Douglas-fir and lodgepole pine growth in a montane forest located in southern British Columbia, Canada as measured using tree ring analysis. Simulations of the long-term impacts of alternative future climate change scenarios on forest productivity in young and established stands were conducted with the verified model.

## Methods

### 2.1. Model Description

FORECAST Climate was developed as an extension of FORECAST [26] which is a stand-level, management-oriented forest growth simulator. FORECAST was designed to accommodate a wide variety of harvesting and silvicultural systems in order to compare and contrast their effect upon forest productivity, stand dynamics and a series of biophysical indicators of non-timber stand values. The model has been used in a wide variety of applications and has been evaluated against field data for growth, yield, ecophysiological and soil variables [27–30].

FORECAST is a ‘hybrid’ model and many of its parameters are calibrated using historical bioassay data inputted to the model. As with any model of this type, a fundamental assumption with respect to its successful calibration and application is that the past climate regime constitutes a faithful representation of future climate conditions. The validity of this assumption is now questionable given anticipated trends in greenhouse gas emissions and their associated impacts on future temperature and precipitation patterns [31]. The FORECAST model simulates the effect of light and nutrient availability on forest productivity but it has no explicit representation of moisture or temperature on ecosystem processes. Thus, the rationale in developing FORECAST Climate was to incorporate these two factors. The foundation for FORECAST Climate was established through the creation of a dynamic linkage with a forest hydrology model including direct feedback to the core processes driving forest ecosystem production.

**2.1.1. The basic FORECAST model.** In FORECAST, the rates of key ecosystem processes are combined with data describing rates of decomposition, nutrient cycling, light competition, and other ecosystem properties to simulate annual changes in forest growth (Fig 1). Plant populations can be initiated from seed and/or vegetatively, and stand development can occur with or without competition from non-target tree species and understory populations. Decomposition and dead organic matter dynamics are simulated using a method in which specific biomass components (eg. foliage, fine roots, branches, etc.) are transferred at the time of tissue death to one of a series of independent litter types. Residual litter mass and its associated nutrient content are transferred to active and passive humus pools when the mass remaining is within 15–20% of the original litter mass. Typically, mean residence times for active and passive humus types are 50 and 600 years, respectively. See [26] for further details.

**2.1.2. The ForWaDy Model.** The Forest Water Dynamics (ForWaDy; [32]) model simulates the hydrologic dynamics of a forest stand on a daily time step for a given set of climatic and vegetation conditions. The model was specifically designed with a structure to facilitate its linkage to FORECAST [32]. It has been shown to perform well for predicting the effect of forest management on evapotranspiration [33] and temporal patterns in soil moisture content under field conditions [33, 34]. The model represents potential evapotranspiration (PET) using an energy balance approach based on a modified version of the Priestly-Taylor equation [35]. This equation is effective in predicting evapotranspiration under a wide variety of forest types and conditions [36–39]. Net shortwave solar radiation interception is used to drive the PET calculations. It is calculated for each tree and plant species from a light competition submodel built into FORECAST (see [26]) and surface albedo. ForWaDy includes a representation of the

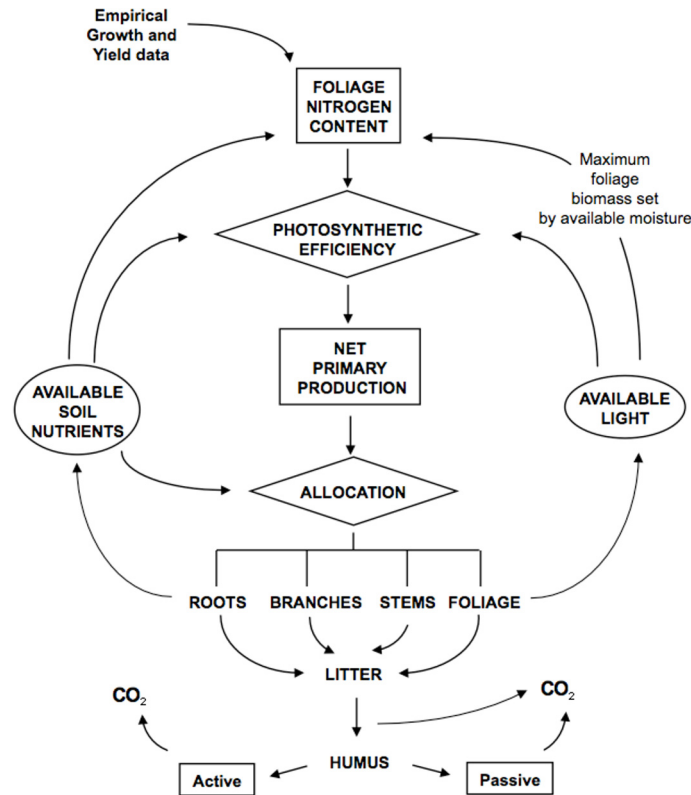

**Fig 1. Schematic illustration of the key ecosystem processes and flows represented in FORECAST (after [30]).**

doi:10.1371/journal.pone.0135034.g001

vertical flow of water through canopy and soil layer compartments (Fig 2). Movement of water through each soil layer is regulated by its physical properties that dictate moisture holding capacity, permanent wilting point moisture content, and infiltration rate.

Water stress is calculated for each species separately on a daily time step and is expressed as a transpiration deficit index (TDI). The TDI is the relative difference between potential energy-limited transpiration demand and actual transpiration:

$$TDI_{i,d} = (CanT_{Demand, i,d} - CanT_{Actual, i,d}) / CanT_{Demand, i,d} \quad (1)$$

where:

$CanT_{Demand, i,d}$  = energy-driven transpiration demand for species  $i$  (mm) on day  $d$ , as a function of leaf area index, intercepted short-wave radiation, canopy albedo, and canopy resistance,

$CanT_{Actual, i,d}$  = actual tree transpiration for species  $i$  (mm) on day  $d$ , as a function of  $CanT_{Demand, i,d}$ , root occupancy, and available soil moisture.

A detailed description of the ForWaDy model is provided in the S1 File. Its general data requirements are listed in Table 1.

**2.1.3. Simulating the effect of increasing CO<sub>2</sub> on forest growth.** Higher atmospheric CO<sub>2</sub> concentrations ( $c_a$ ) are associated with lower stomatal water vapour conductance [40, 41] and greater water use efficiency [42, 43]. These processes are represented in ForWaDy using a function that modifies canopy resistance in each species in relation to projected changes in  $c_a$  [44]. The functional curve is derived from the physiological relationship between relative net assimilation rate and changes in  $c_a$  relative to a reference atmospheric CO<sub>2</sub> concentration

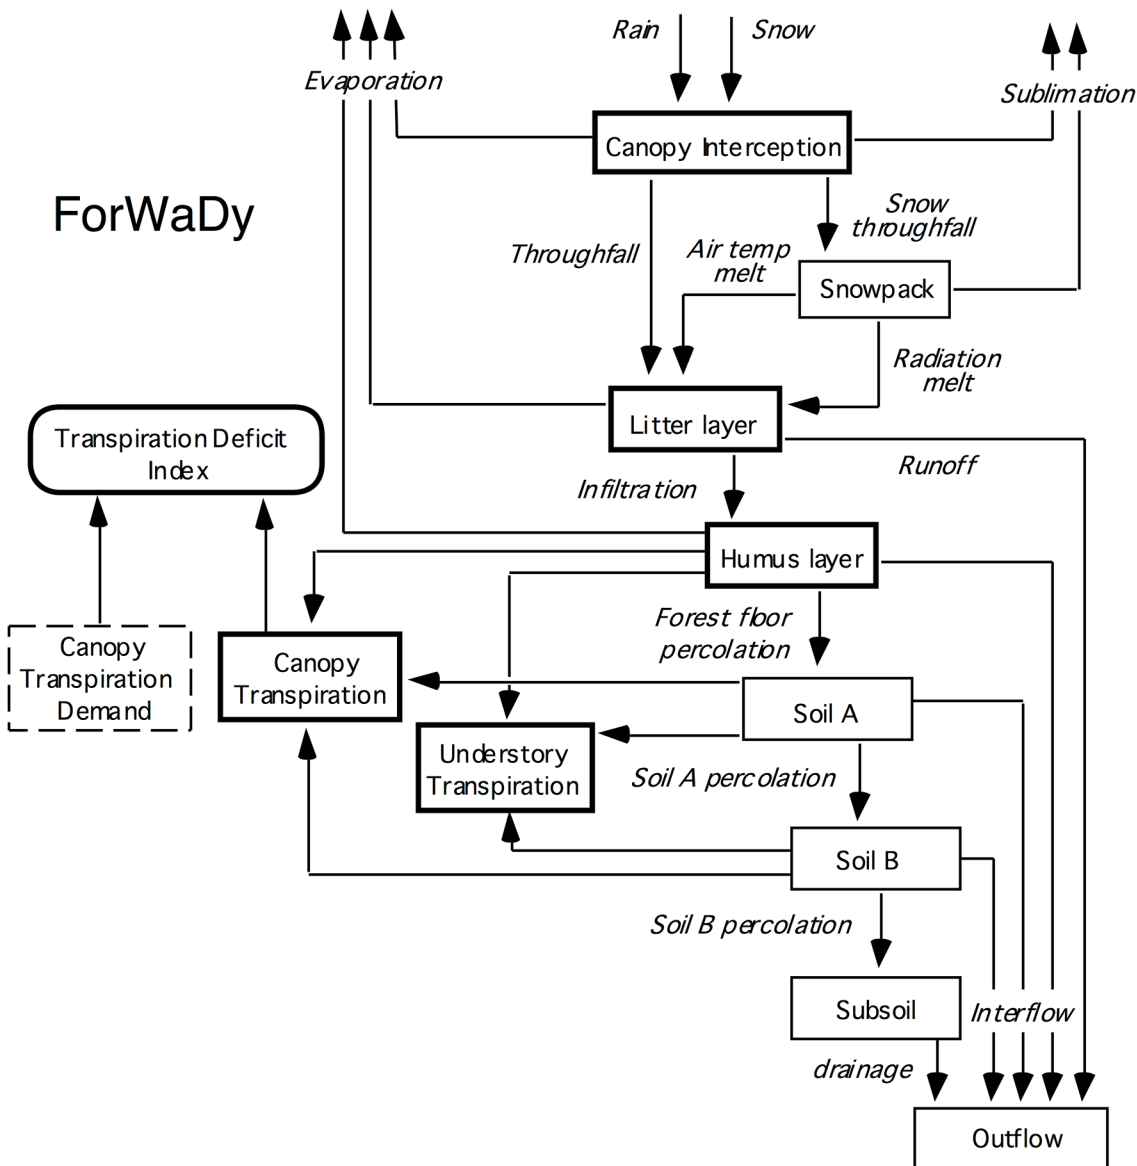

**Fig 2. Schematic diagram of the ForWaDy model indicating water flow pathways and storage compartments.**

doi:10.1371/journal.pone.0135034.g002

(Eq 2A). The impact of  $c_a$  on stomatal conductance is given in Eq 2B [44], and stomatal conductance in relation to canopy resistance in Eq 3 (see Fig 3B, for an example).

$$A_{n(\text{rel})} = [(c_a - r') * (c_{a0} + 2r')] / [(c_a + 2r') * (c_{a0} - r')] \quad (2A)$$

where:

- $A_{n(\text{rel})}$  = relative net assimilation rate
- $c_a$  = current atmospheric CO<sub>2</sub> concentration (ppm)
- $c_{a0}$  = reference atmospheric CO<sub>2</sub> concentration (determined from reference climate data, ppm)
- $r'$  = CO<sub>2</sub> compensation point = 40 ppm

**Table 1. General data requirements for the ForWaDy model.**

| Climate data (daily)                              | Vegetation data                           | Forest floor & soil data                                     |
|---------------------------------------------------|-------------------------------------------|--------------------------------------------------------------|
| mean, max and min air temperature (°C)            | seasonal conifer and hardwood LAI         | fine litter mass (kg/ha)                                     |
| solar radiation <sup>1</sup> (MJ/m <sup>2</sup> ) | seasonal understory % cover               | humus layer depth (cm) and bulk density (g/cm <sup>3</sup> ) |
| total precipitation (mm)                          | rooting depths for trees (cm)             | depth of mineral soil layers (cm)                            |
| snow fraction                                     | rooting depths for understory (cm)        | soil texture <sup>3</sup> (by layer)                         |
| atmospheric [CO <sub>2</sub> ] <sup>2</sup>       | canopy resistance and albedo (by species) | coarse fragment content (% by layer)                         |

<sup>1</sup> Solar radiation may be estimated from max and min air temperature, elevation, latitude, slope and aspect using published radiation models.

<sup>2</sup> Only annual data required.

<sup>3</sup> Standard texture classes used to estimate clay content.

doi:10.1371/journal.pone.0135034.t001

and the relative stomatal conductance for water vapour ( $g_{w(rel)}$ ; dimensionless) is

$$g_{w(rel)} = A_{n(rel)} / c_{a(rel)} \tag{2B}$$

where:

$c_{a(rel)}$  = relative atmospheric CO<sub>2</sub> conc =  $c_a/c_{a0}$  (dimensionless)

Adjusted canopy resistance ( $R_{Can,adj}$ ; dimensionless) is

$$R_{Can,adj} = R_{Can,ref} + R_{Can,ref} * (1 - g_{w(rel)}) \tag{3}$$

where:

$R_{Can,ref}$  = reference canopy resistance (dimensionless)

Many models incorporate a representation of the direct effect of CO<sub>2</sub> fertilization on tree growth [45] based on evidence from short-term studies [46, 47]. There is little evidence, however, supporting the long-term impacts of CO<sub>2</sub> fertilization on forest growth [48, 49]. As such, the FORECAST Climate model does not presently include this as a control on growth.

**2.1.4. Linkage of FORECAST and ForWaDy.** The ForWaDy—FORECAST linkage couples forest water availability directly with ecosystem process simulation. Furthermore, this linkage is dynamic in that the respective functions from each model are continuously updated in response to the iterative sharing of information encoded within a series of feedback loops (see Fig 4). One aspect of this linkage is reconciling FORECAST’s annual time step with the daily time step used in ForWaDy, the latter of which is required to properly capture short-term moisture limitations. This was accomplished by aggregating the daily ForWaDy output into an annual index that was then used as input to FORECAST (Fig 4). FORECAST, in turn, supplies input to ForWaDy at the beginning of each growing season with respect to vegetation and forest floor conditions (Fig 4).

**2.1.5. Accounting for climate impacts on productivity.** The impact of climate on tree and plant growth in FORECAST Climate is focused primarily on the relationships between growth rate, temperature and water stress. These relationships are represented using species-specific, curvilinear response functions simulated on a daily time step. The net daily growth response index of species *i* on day *d* (GRIDay,i,d) is derived as the product of two indices,

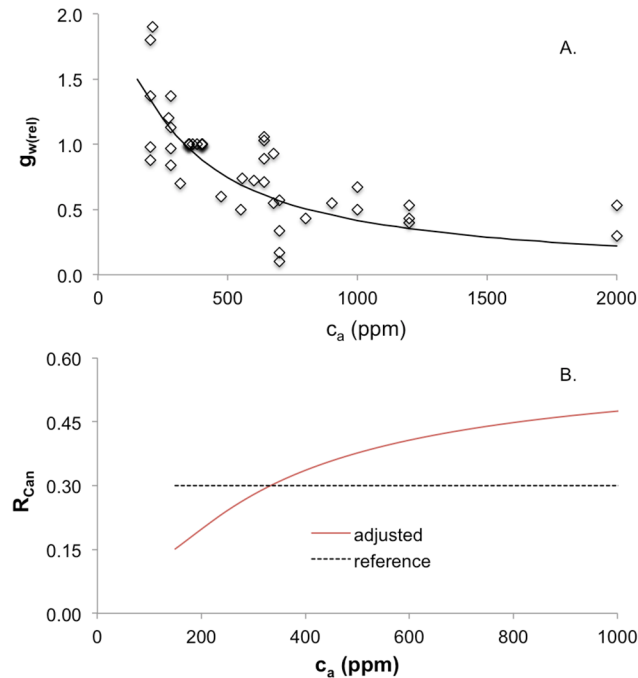

**Fig 3. Relationships between atmospheric CO<sub>2</sub> concentration (c<sub>a</sub>) and (A) relative stomatal conductance and (B) canopy resistance.** (A) Observations of relative stomatal conductance of water vapour (g<sub>w(rel)</sub>) under changing atmospheric CO<sub>2</sub> concentrations (c<sub>a</sub>; data from [44] re-plotted). The solid line is derived from Eq 2B where c<sub>a(rel)</sub> = c<sub>a</sub>/c<sub>a0</sub>, c<sub>a0</sub> is 360 ppm, and An<sub>(rel)</sub> is obtained from Eq 2A. (B) An example of the calculation of adjusted canopy resistance (R<sub>Can,adj</sub>) as a function of c<sub>a</sub>, using a reference canopy resistance (R<sub>Can,ref</sub>) value of 0.3.

doi:10.1371/journal.pone.0135034.g003

calculated as temperature and water stress response functions:

$$GRI_{Day\ i,d} = T_{Growth, i,d} * S_{Growth, i,d} \tag{4}$$

where:

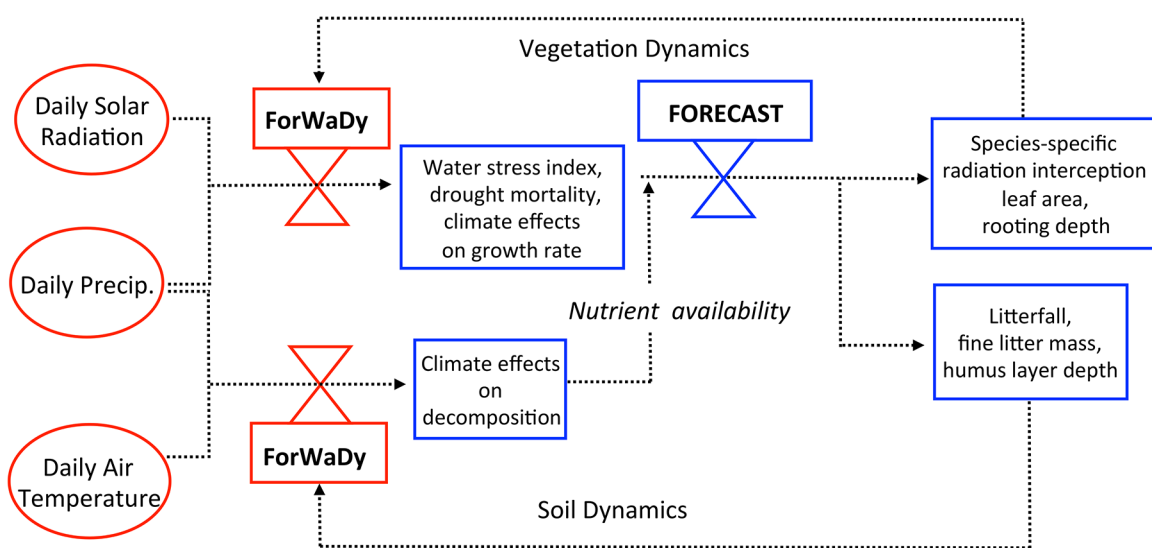

**Fig 4. A schematic diagram illustrating feedback loops and data transfer pathways between FORECAST and ForWaDy.**

doi:10.1371/journal.pone.0135034.g004

$T_{\text{Growth},i,d}$  = The temperature response index (range 0–1; dimensionless) for species  $i$  on day  $d$ . Specified in the model as a user-defined graphical function of daily mean air temperature (see Section 2.2.3).

$S_{\text{Growth},i,d}$  = The water stress response index (range 0–1; dimensionless) for species  $i$  on day  $d$ . Specified in the model as a user-defined graphical function of the daily mean water stress index (see Section 2.2.3).

The temperature response index is designed to encapsulate the complex physiological growth processes governing tree and understory response to variations in mean daily temperature. It is intended to represent net effect of variations in temperature on primary productivity (NPP) by accounting for the impact of temperature on both photosynthesis and respiration. Data for calibrating the index can be derived from greenhouse studies and/or *in situ* measurements of seasonal primary productivity (eddy covariance, for example; see [50]).

The water stress response index is calculated from TDI (see section 2.1.2). The daily TDI value represents the degree to which a species was able to meet its energy-driven transpiration demands (a higher TDI value indicates greater moisture stress). Plants typically respond to water stress by closing stomata to conserve water, leading to an associated reduction in photosynthetic production (see [51]). A negative relationship between  $S_{\text{Growth}}$  and TDI is therefore expected.

The net daily growth response index is summed to calculate an annual growth response index for year,  $y$  ( $GRI_{\text{Year},i,y}$ ; Eq 5).

$$GRI_{\text{Year}, i, y} = \sum_{d=1}^{365} GRI_{\text{Day}, i, d} \tag{5}$$

This index is used as a weighting factor that reflects the ‘quality’ of a given climate year relative to an expected growth rate (further details below).

The climate response functions within FORECAST Climate are calibrated using historical daily climate data. A ‘reference’ daily climate series must be compiled with data derived from a climate station near the forest area to be modeled, and should span a minimum 20-year time period. A summary of the climate data required is provided in Table 1.

Using the reference data set, a calibration run is conducted from which the annual growth response index is calculated (Eq 5). By averaging the annual values for the length of the reference climate period, a normalized growth response index is derived for each species (Eq 6) that reflects growth conditions in an average historical climate year. This index is used in subsequent calculations.

$$NGRI_i = \left( \sum_{y=1}^n GRI_{\text{Year}, i, y} \right) / n \tag{6}$$

where:

$NGRI_i$  is the normalized growth rate index for species  $i$  derived from the reference climate data set (dimensionless)

$GRI_{\text{Year},i,y}$  is the annual growth response index for species  $i$  (Eq 5).

$n$  = the number of years in the historical climate data set

Simulation of growth response to climate in FORECAST Climate is achieved by modifying base growth rates (as determined in the underlying FORECAST model—section 2.1.1) according to the climate relationships described in section 2.1.4. A climate-limited growth rate is



calculated by multiplying the base growth rate (Eq 7A) by a climate response factor (Eq 7B).

$$CGR_{i,y} = (BGR_{i,y} * CRF_{i,y}) \tag{7A}$$

$$CRF_{i,y} = (GRI_{Year, i,y} - NGRI_i) / NGRI_i \tag{7B}$$

where:

$CGR_{i,y}$  is the climate-limited growth rate for species  $i$  in year  $y$  (tons ha<sup>-1</sup>),

$BGR_{i,y}$  = the base growth rate for species  $i$  and year  $y$  determined in FORECAST as the light and nutrient-limited growth rate (tons ha<sup>-1</sup>),

$CRF_{i,y}$  is the climate response factor for species  $i$  in year  $y$  (dimensionless), and  $GRI_{Year, i,y}$  and  $NGRI_i$  are as defined in Eqs 5 and 6, respectively.

**2.1.6. Climate and decomposition rates.** The decomposition of dead organic matter in FORECAST is represented based upon user-defined mass loss rates associated with litter quality and derived from field incubation experiments. A maximum of 40 dead organic matter types may be defined and simulated within the model [26]. In FORECAST Climate, decomposition rates are modified by soil moisture content and air temperature with the calculation of a daily decomposition response index (Eq 8). The model does not include any representation of the potential effects of mixing different litter types on mass loss rates.

$$DRI_{Day, l,d} = T_{Decomp, d} * M_{Decomp, l,d} \tag{8}$$

where:

$DRI_{Day, l,d}$  = daily decomposition response index (range 0–1; dimensionless) for soil layer  $l$  on day  $d$

$T_{Decomp, d}$  = Temperature decomposition response (range 0–1; dimensionless). Specified in the model as a user-defined graphical function of daily mean air temperature (see Fig 5A).

$M_{Decomp, l,d}$  = Moisture decomposition response (range 0–1; dimensionless). Specified in the model as a user-defined graphical function of daily moisture content (see Fig 5B).

Assuming moisture is not a limiting factor, the decomposition rate of dead organic matter is generally faster in warmer environments [52, 53]. The default temperature response function is shown in Fig 5A, and is based upon a Q<sub>10</sub> factor of 2 [52, 54]. The moisture response functions for litter, humus, and soil, are shown in Fig 5B.

The climate impact on decomposition rates is represented using the same procedure as the growth response index calculation (section 2.1.5). First, a normalized decomposition response index (NDRI<sub>l</sub>) is calculated for each soil layer  $l$  using the reference climate series:

$$NDRI_l = (\sum_{y=1}^n DRI_{Year, l,y}) / n \tag{9}$$

where:

NDRI<sub>l</sub> is the normalized decomposition response index for layer  $l$  derived from the climate calibration data (dimensionless)

$DRI_{Year, l,y}$  is the summed annual decomposition response index for each soil layer  $l$

$n$  = the number of years in the reference climate data set

A climate decomposition factor (CDF<sub>x,y</sub>; Eq 10A) is then calculated as the relative difference between the current and normalized decomposition response indices (Eq 9). Climate feedback is represented by a climate decomposition rate index (CDR<sub>l,y</sub>) for each soil layer  $l$  and year  $y$

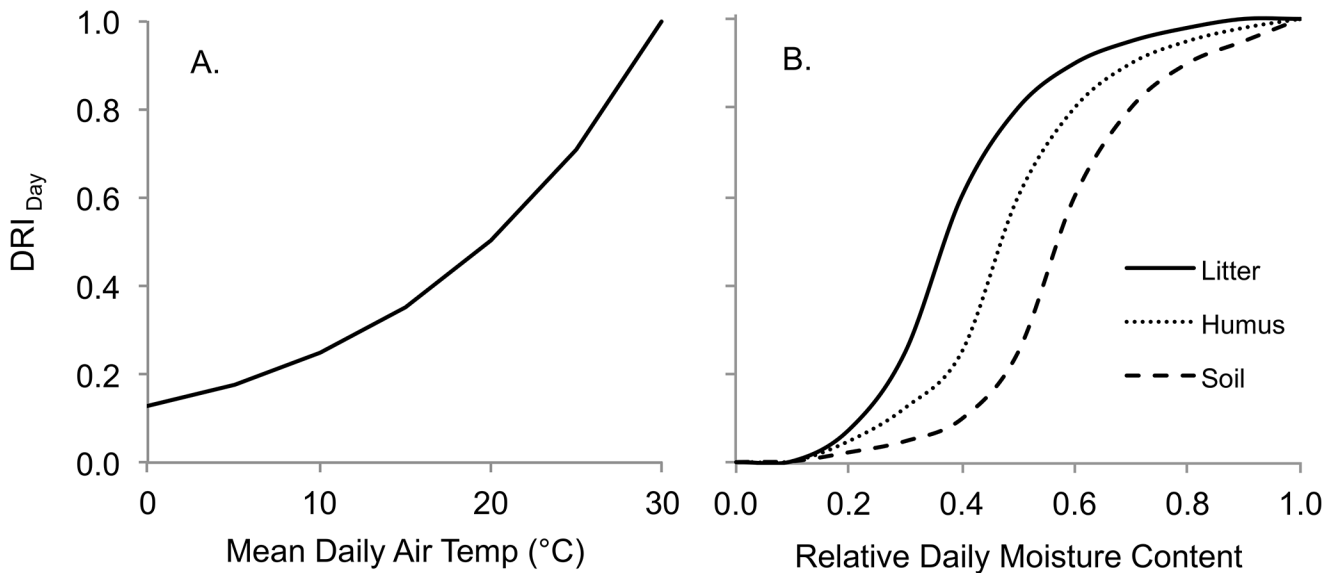

**Fig 5. Daily decomposition index in relation to (A) daily air temperature, and (B) relative daily moisture content.** (A) The relationship with mean daily air temperature is based upon a  $Q_{10}$  function where  $Q_{10} = 2$ . (B) Moisture content relationships are shown for litter, humus, and mineral soil (see text for details).

doi:10.1371/journal.pone.0135034.g005

(Eq 10B).

$$CDF_{x,y} = (DRI_{Year,l,y} - NDRI_l) / NDRI_l \quad (10A)$$

$$CDR_{x,y} = BDR_{x,y} * CDF_{x,y} \quad (10B)$$

where:

$CDF_{x,y}$  is the climate decomposition factor for litter type  $x$  in year  $y$  (dimensionless)

$DRI_{Year,l,y}$  and  $NDRI_l$ , are as defined above (Eq 9),

$CDR_{x,y}$  is the expected climate decomposition rate for litter type  $x$  and year  $y$  ( $\text{tons ha}^{-1}$ )

$BDR_{x,y}$  is the base decomposition rate for litter type  $x$  in year  $y$  determined as a function of litter quality ( $\text{tons ha}^{-1}$ )

**2.1.7. Representation of drought-related mortality.** Extended periods of drought can lead to plant mortality, either directly or by increasing vulnerability to biotic disturbance agents [5, 55]. FORECAST Climate includes a drought mortality function in which a two-year running-average TDI is used to predict annual mortality. The two-year running average reflects the negative impact of consecutive years of drought (see, for example, [56]). The drought mortality relationship is specified in the model as a user-defined graphical function of species-specific, two-year running average TDI (see Section 2.2.3).

## 2.2. Evaluating model performance using tree-ring analysis

FORECAST Climate was calibrated for a montane forest in south central British Columbia. The model was used to predict annual sapwood production (a proxy measure of tree ring growth), which was then compared against measured 30-year ring chronologies.

**2.2.1. Study area.** The study area was located in south central British Columbia, Canada near the city of Kamloops ( $50^{\circ}40'00''$  N,  $120^{\circ}20'00''$  W), and is classified as a dry cool subzone of the Interior Douglas-fir biogeoclimatic zone [57]. The site, located in crown-owned forest land, is dominated by stands of interior Douglas-fir (*Pseudotsuga menziesii* var. *glauca*) and

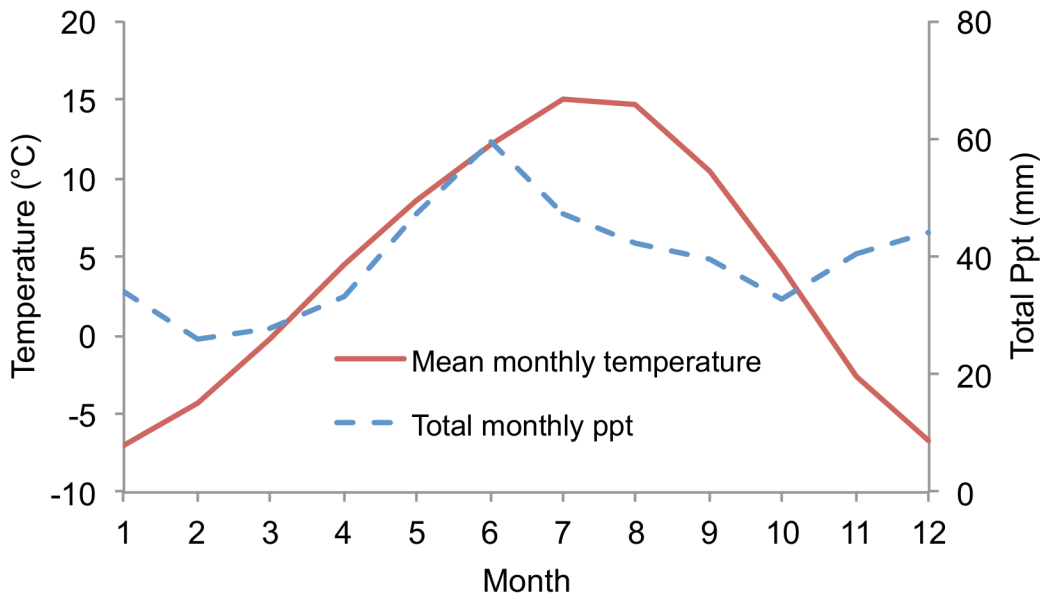

**Fig 6. Average monthly temperature and precipitation from the Red Lake climate station (1975–2004).**

doi:10.1371/journal.pone.0135034.g006

lodgepole pine (*Pinus contorta*). These species are common in montane regions in the southern interior of British Columbia, ranging from 900 to 1400m in elevation. The closest local climate station with a complete climate record (Red Lake: Elevation = 1162m, 50°56'06" N, 120° 48'00" W) was selected from which 30 years of daily data (spanning the years 1975–2004) were obtained. Average monthly temperature and precipitation for Red Lake are shown in Fig 6.

**2.2.2. Tree-ring analysis.** A total of 5 plots were randomly selected from a series of candidate stands identified using forest inventory data from the study site. Plots were split with 3 Douglas-fir and 2 lodgepole pine-dominated stands. Stands with clear signs of fire scars or damage from biotic agents that could have masked a climate signal were avoided. Plot centers were established using a variable radius to define plot area such that a total of 20 dominant and/or co-dominant trees were identified within the plot area. Species, elevation, slope, aspect, and slope position were recorded for each plot. The stands ranged in age from 36 to 150 years (Table 2).

Within each plot, a total of 20 dominant or co-dominant trees were cut down and a slice (cookie) approximately 4 cm thick removed from the base of each stem, within 20 cm of the soil surface. The cookies were prepared for analysis in the Tree-Ring Laboratory at the University of Northern British Columbia, using standard procedures [58]. Annual tree ring width was

**Table 2. Characteristics of sample plot locations from which trees were harvested for tree-ring analysis and chronology statistics.**

| Plot ID | Species | AverageAge (y) | Elevation (m) | Slope(%) | Aspect (deg.) | Slope Position | Mean sensitivity | Serial correlation |
|---------|---------|----------------|---------------|----------|---------------|----------------|------------------|--------------------|
| 4       | Fd      | 54             | 1250          | 25       | 295           | mid            | 0.288            | 0.836              |
| 9       | Fd      | 67             | 978           | 20       | 50            | mid            | 0.275            | 0.812              |
| 14      | Fd      | 36             | 1125          | 18       | 64            | mid            | 0.244            | 0.812              |
| 34      | PI      | 60             | 1300          | 8        | 26            | low            | 0.124            | 0.946              |
| 71      | PI      | 150            | 1356          | 2        | 322           | flat           | 0.159            | 0.846              |

A total of 20 trees per plot were sampled. Fd = Douglas fir, PI = lodgepole pine.

doi:10.1371/journal.pone.0135034.t002

measured to the nearest 0.01mm using a Windendro system. The ARSTAN software [59] was used to prepare and cross-date the final chronologies. All series were de-trended by fitting a spline of 50% frequency response across 67% of the series length to remove the low frequency age trend. Slight modifications were made to spline stiffness for two of the series to improve their fit to the data. De-trended data were used to isolate the impacts of year-to-year climate variability on relative tree productivity. Chronologies for each plot were constructed using the final ARSTAN tree ring index. Each chronology was restricted to the 1975–2004 period and normalized by dividing by the average ring index. Typically, tree rings are compared against two consecutive years of climate data (current and previous year) [23, 60]. This is because early season wood growth is partly a function of climate suitability in the previous year and its impact on carbohydrate reserves [61].

**2.2.3. FORECAST Climate calibration.** Detailed descriptions of FORECAST calibration data requirements are provided in [26] and [62]. The base FORECAST model was calibrated with an existing data set from the Interior Douglas-fir dry cool subzone [63]. The data set includes both Douglas-fir and lodgepole pine, and two minor vegetation functional groups (grasses and shrubs) common to the area. Calibration of the climate response functions in FORECAST Climate is described in the following sections.

The hydrological submodel requires data describing characteristics of the soil profile (Table 3) and characteristics of simulated trees and minor vegetation with respect to the calculation of daily evapotranspiration and water stress (Table 4). Average soil characteristics were inferred from soil pits dug in each of the plots.

Calibration of the climate response functions was completed as follows. Daily temperature and water-stress growth response curves were developed for Douglas-fir [67,68] and lodgepole pine [69, 70] based upon literature reviews of climate-growth relationships (Fig 7A and 7B). The sharp increase in growth beginning around 5°C for both species is indicative of the heat sum required to break dormancy. Each curve varies with respect to the optimal temperature range for growth and the relative rate of decline beyond the optimum, depending on a plant’s tolerance characteristics. The decline at higher temperatures represents the increase in respiration associated with elevated temperatures [50].

A relative drought mortality curve was developed for each tree species based on its ecological characteristics within the subzone (Fig 7C). Douglas-fir was assumed to be slightly more tolerant of drought stress relative to lodgepole pine. Each species-specific mortality function was evaluated using provincial forest health survey data (not shown) to verify that it produced realistic mortality projections when the model was run with the historical reference climate data.

**2.2.4. Growth simulation using historical climate data.** To evaluate the capability of FORECAST Climate to reproduce the measured, climate-related annual variation in tree ring growth, the model was run using the historical climate data from the period of 1975–2004. The

**Table 3. Parameter values in the hydrological submodel specific to the simulation of plant-available water within soil layers.**

| Soil layer | Soil Texture Class | Coarse Fragment Content (%) | Soil Depth <sup>1</sup> (cm) | Field Capacity Moisture Content <sup>2</sup> |
|------------|--------------------|-----------------------------|------------------------------|----------------------------------------------|
| Humus      | N/A                | 0                           | 12.5                         | 0.32                                         |
| Mineral A  | Silt loam          | 25                          | 40                           | 0.25                                         |
| Mineral B  | Silt loam          | 25                          | 45                           | 0.25                                         |
| Mineral C  | Silt loam          | 25                          | 50                           | 0.25                                         |

<sup>1</sup> The starting humus depth is shown, but humus depth can change over time depending on rates production and decomposition.

<sup>2</sup> Volumetric water content above which drainage occurs.

doi:10.1371/journal.pone.0135034.t003

**Table 4. Parameter values in the hydrological submodel specific to the simulation of evapotranspiration and water stress for trees and minor vegetation.**

| Species                    | Canopy Parameters   |                         | Permanent Wilting Point <sup>3</sup> |              | Maximum Root Depth (cm) |
|----------------------------|---------------------|-------------------------|--------------------------------------|--------------|-------------------------|
|                            | Albedo <sup>1</sup> | Resistance <sup>2</sup> | Humus                                | Mineral Soil |                         |
| <b>Trees</b>               |                     |                         |                                      |              |                         |
| Douglas-fir                | 0.12                | 0.3                     | 0.08                                 | 0.12         | 100                     |
| lodgepole pine             | 0.12                | 0.24                    | 0.1                                  | 0.13         | 100                     |
| <b>Minor vegetation</b>    |                     |                         |                                      |              |                         |
| <i>Calamagrostis</i> grass | 0.12                | 0.15                    | 0.09                                 | 0.11         | 75                      |
| <i>Vaccinium</i> shrub     | 0.12                | 0.10                    | 0.10                                 | 0.11         | 75                      |

<sup>1</sup> Estimated values.

<sup>2</sup> Reference relative canopy resistance to water loss through stomata ( $R_{Can,i}$ ) [64]. Higher values indicate greater resistance.

<sup>3</sup> Relative volumetric moisture content (proportion of total volume) at which soil water uptake is suspended [65, 66].

doi:10.1371/journal.pone.0135034.t004

30-year climate data set was cycled 5 times to generate 150 years of daily data. Model projections of annual sapwood production were subsequently compared against the normalized tree ring indices for the corresponding climate years using regression analysis. However, because annual ring growth is fueled both by carbohydrates stored from the previous year and the current year's production, each ring index was compared against a normalized average of the previous and current year's simulated sapwood production.

## 2.3. Simulation of long-term climate change impacts

**2.3.1. Development of climate change scenarios.** To illustrate the potential of FORECAST Climate to simulate the impacts of climate on the growth and development of forests within the study area, climate change projections were derived from two established general circulation models (GCMs) included as part of the Intergovernmental Panel on Climate Change AR5 analysis [31], HadGem2 ([www.enes.org/models/earthsystem-models/metoffice-hadley-centre/hadgem2-es](http://www.enes.org/models/earthsystem-models/metoffice-hadley-centre/hadgem2-es)) and CanESM2 ([www.cccma.ec.gc.ca/data/cgcm4/CanESM2/rcp45/index.shtml](http://www.cccma.ec.gc.ca/data/cgcm4/CanESM2/rcp45/index.shtml)). A medium range emissions pathway was selected for the two models (Fig 8A). It is based on a representative CO<sub>2</sub> concentration pathway that generates a radiative forcing of 4.5 Wm<sup>-2</sup> (RCP 4.5, [71]). These models and scenario were selected to be representative of the middle of the range of potential climate change scenarios. It should be noted that other scenarios could generate different results. Atmospheric CO<sub>2</sub> concentration for the reference climate scenario was constrained to 2005 values (380 ppm). The regional monthly output from the GCMs for the 2020s, 2050s and 2080s was downscaled to daily data using a direct approach based upon the Red Lake daily climate data series from the years 1975–2004. The resulting data set spanned a 100-year period (2012–2111). Projected changes in mean growing season temperature and precipitation are shown in Fig 8B and 8C. Mean growing season temperature is predicted to increase from approximately 12.5°C in 2012 to 16–17°C by 2111. In contrast, both GCMs predicted only a very gradual declining trend in growing season precipitation during the same period. It should be noted that the interannual variability in temperature and precipitation characteristic of the base reference data is retained as a result of the direct downscaling process.

**2.3.2. Model application for climate change simulation.** FORECAST Climate was used to simulate the long-term impact of climate change on stand growth and development for both Douglas-fir-dominated and lodgepole pine-dominated stand types. Growth in newly planted

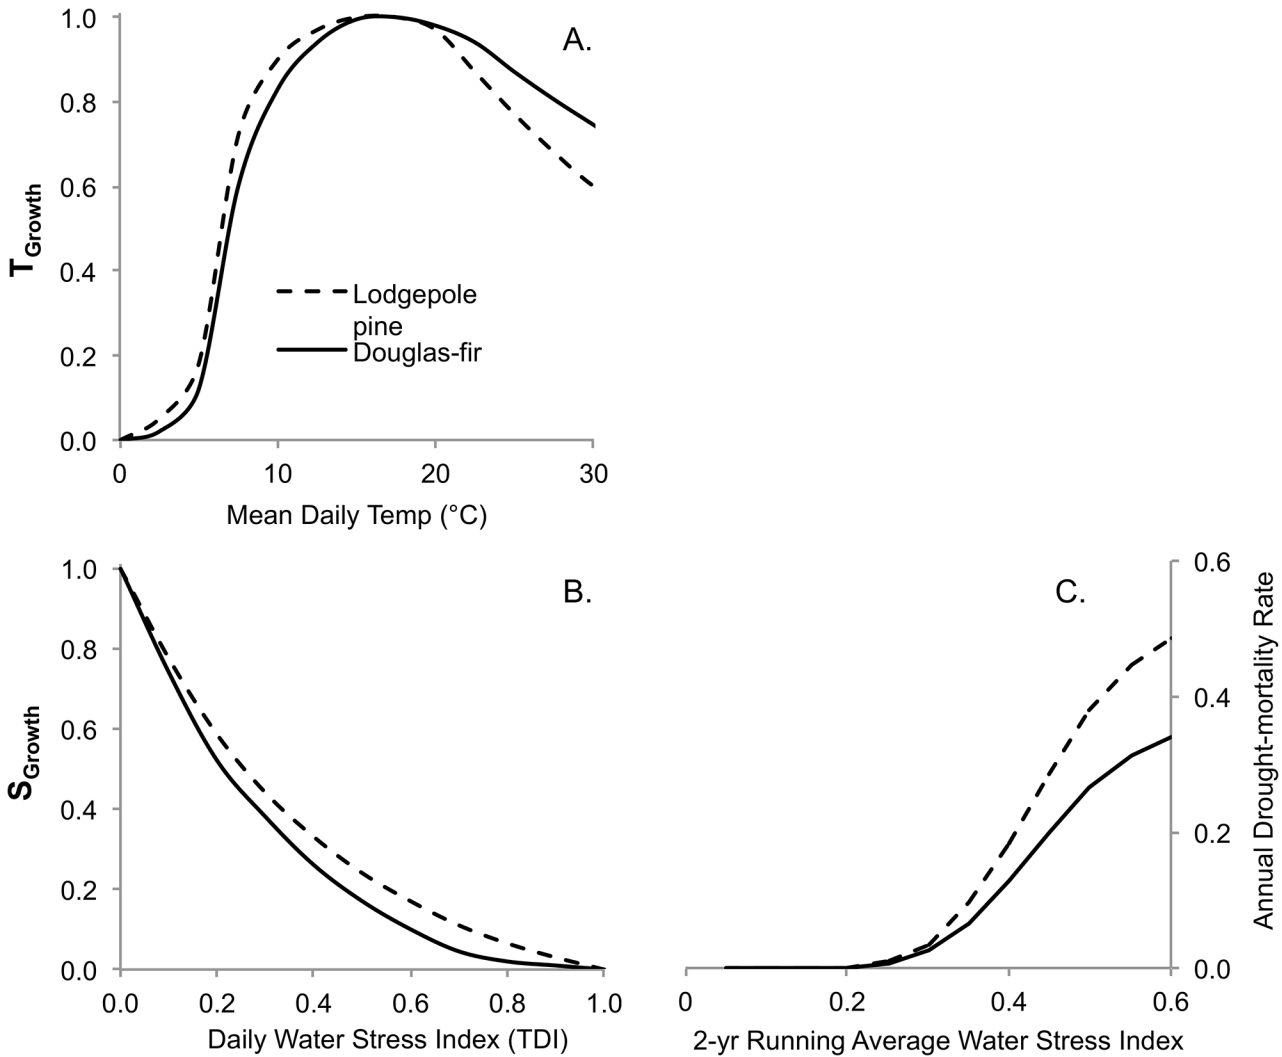

**Fig 7. Climate response functions showing the effect of temperature and water stress on growth (A,B) and mortality (C).** (A) Relationships between mean daily temperature and the  $T_{Growth}$  parameter, and (B) daily water stress and  $S_{Growth}$  parameter used in Eq 4. (C) The drought-related mortality rate as a function of the 2-year running average water stress index.

doi:10.1371/journal.pone.0135034.g007

(age = 1 year) and established stands (starting age = 60 years) was simulated for a 100-year period. In the newly planted stands, the climate began to change immediately (see Fig 8). For established stands, however, the 30-year historical climate data were copied and appended to create 60 years of data before the climate change period began at age 61. A total of eight runs were completed (2 climate scenarios \* 2 species \* 2 age classes).

## Results

### 3.1. Model evaluation against tree ring data

Sapwood production predictions were concordant with 48% to 73% of the variation in measured annual ring widths in 4 of the 5 plots (Fig 9). One Douglas-fir plot (Plot #9) showed no significant correlation with the other plots suggesting that annual variation in tree growth in this plots was likely a consequence of factors other than climate. This plot was therefore

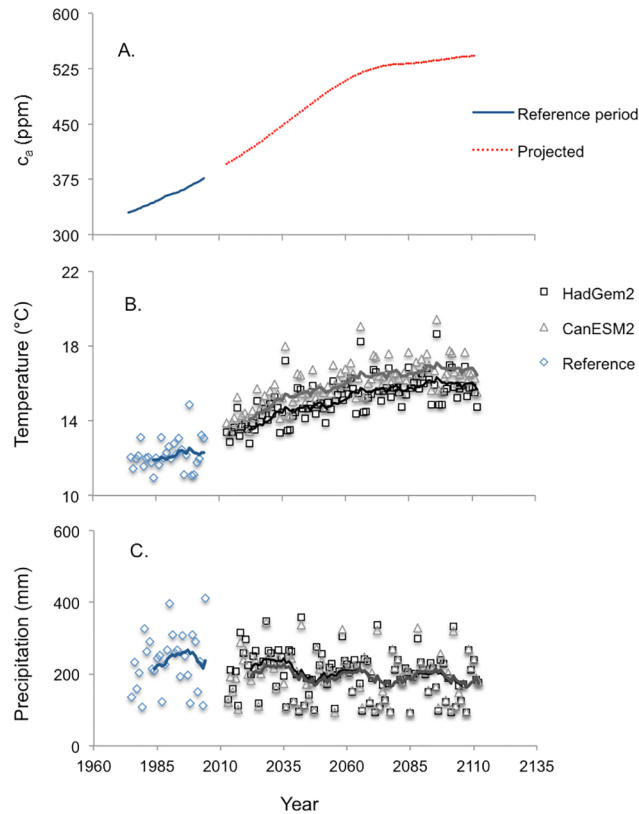

**Fig 8. Reference climate data and projected atmospheric [CO<sub>2</sub>] (A), growing season temperature (B), and precipitation (C).** (A) Projected increase in atmospheric [CO<sub>2</sub>] ( $c_a$ ) for the RCP 4.5 emissions scenario, (B) projected growing season (MAY–SEP) mean daily air temperature, and (C) projected total growing season precipitation for the next 100 years based on two downscaled climate change projections (see text). Lines represent the 10-year moving average for each series in panels B and C.

doi:10.1371/journal.pone.0135034.g008

excluded from subsequent analysis. The average slopes of the regression lines were 1.04 and 1.05, for the remaining Douglas-fir (#4 & #14) and pine (#71 & #34) plots, respectively.

### 3.2. Climate change impacts on tree growth

Both climate change scenarios had a net positive impact on growth rates for newly planted stands, as indicated by the climate response factor (CRF, Eq 7; Fig 10A). Ten-year running averages show that the CRF values under the historical (reference) climate oscillate around zero, while those for the climate change scenarios are consistently higher. The impact of climate change on stemwood biomass was generally positive for both tree species, except in pine stands 85 years and older (Fig 10B). In Douglas-fir, stemwood biomass was 11 to 17% higher at rotation age (80 years), and 4 to 7% higher in pine. Climate change triggered more drought-related mortality (Fig 10C), which was associated with an increase in both the frequency and intensity of water stress (Fig 11B and 11C). The increase in water stress in the climate change scenarios occurred despite an increase in canopy resistance associated with higher CO<sub>2</sub> concentrations (Fig 11A).

In established (60 year-old) stands, the impact of climate change was projected to be positive in terms of the CRF (Fig 12A). This was not the case for stemwood biomass, however. For Douglas-fir, there was little difference among the historical and climate change scenarios, though biomass under the latter was lower when stands were very old (Fig 12B). In pine,

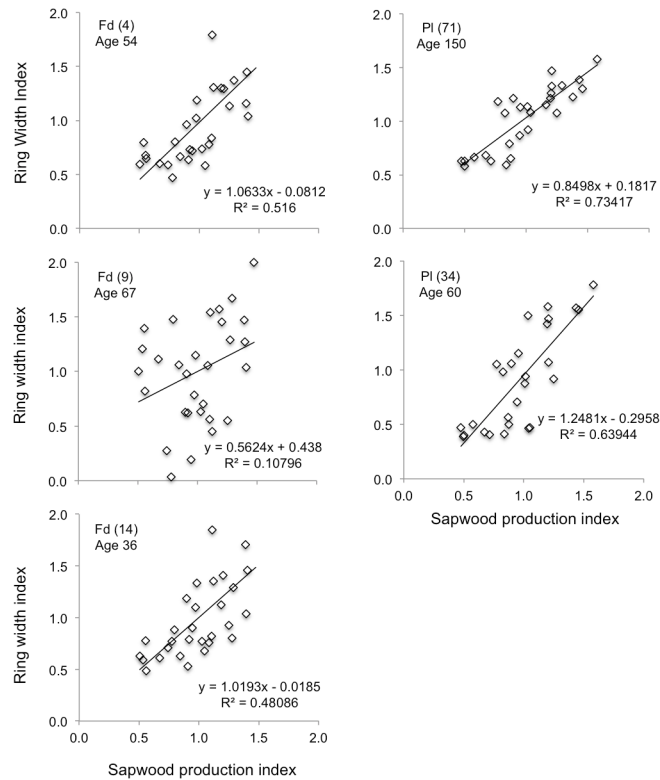

**Fig 9. Comparison of the simulated sapwood production index with the measured ring width index.** Data are shown for Douglas-fir (Fd) and lodgepole pine (PI) plots for the 30-year climate reference period. Average tree age is shown for each plot.

doi:10.1371/journal.pone.0135034.g009

however, climate change reduced stemwood biomass early in the simulation. This discrepancy became more pronounced over time. Lower stemwood biomass was associated with elevated drought-related mortality in both species but more so in pine (Fig 12C).

Projected impacts in newly planted stands of the reference climate and climate change (CanESM2) scenarios on the daily growth response index are shown for three future climate periods (Fig 13). The daily growth response index ( $GRI_{Day}$ ) is determined as the product of the daily growth response to temperature ( $T_{Growth}$ ) and water stress ( $S_{Growth}$ ) (Eq 4) and is summed for the year to determine the annual growth response index ( $GRI_{Year}$ ). The model predicts a considerable lengthening of the temperature-limited growing season, as approximated by the number of calendar days where the value of  $T_{Growth} \geq 0.25$  (data not shown). The average length of the temperature-limited growing season for both species increased by 42 days in the period from 2073–2102 relative to the reference period (1975–2004). The increase, however, was also accompanied by higher daily drought stress during the growing season leading to a mid-summer decline in average  $GRI_{Day}$  (Fig 13).

### 3.3. Climate change impacts on decomposition

Over the first 30 years of the simulation, climate change led to reduced levels of litter mass due to increased mass loss rates (Fig 14A). Thereafter, total litter mass in the climate change scenarios increased to levels above that of the reference climate. Nitrogen (N) release was consistently higher under both climate change scenarios (Fig 14B).



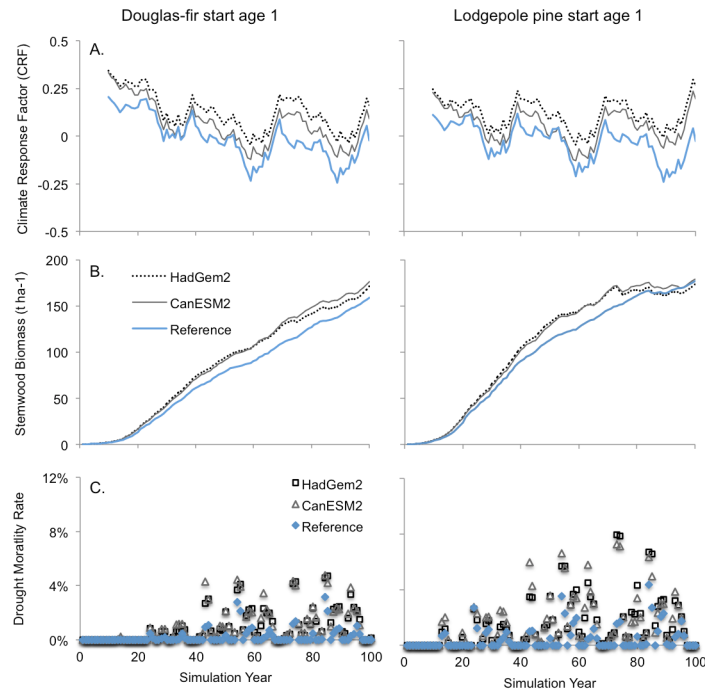

**Fig 10. Impact of climate change on: (A) growth response (CRF), (B) stemwood biomass, and (C) drought-related mortality.** Simulations results for newly planted stands of Douglas-fir are shown on the left and for lodgepole pine on the right. Climate change simulation was initiated at year 1 of the simulation. Lines represent 10-year running averages of annual values. A CRF value near zero indicates that the simulated climate year was similar to the historical average year.

doi:10.1371/journal.pone.0135034.g010

## Discussion

### 4.1. Model evaluation using tree-ring analysis

A variety of metrics have been useful in establishing the relationship between climate and plant productivity (see [72]). One metric used extensively is dendrochronology, in which changes in ring width are linked to annual variation in climate, particularly temperature and moisture [73]. Dendrochronology thus provides a means of assessing how well a forest model can project the impact of climate on plant performance (i.e., annual ring growth). If a model can successfully reproduce ring chronologies as a function of historical climate conditions, it should be reasonable to use these same relationships to predict the future growth response to a changing climate regime (see, for example, [74, 23, 60, 75]).

Dendrochronological records indicate that, in general, annual tree growth in temperate regions tends to be more sensitive to variations in water stress than temperature [76, 77]. FORECAST Climate performed well in capturing the historical effect of climate on ring width indices in 4 of the 5 measured plots. Model output was consistent with years when measured radial growth rates were reduced due to water stress as well as years in which growth was above average.

The positive impacts of temperature on ring width were captured directly by FORECAST Climate as a lengthening of the growing season, and indirectly through the positive influence of enhanced nitrogen mineralization on site productivity.

One of the challenges in using tree ring data is that climate signals can be obscured by other factors that influence growth, such as abiotic and biotic disturbance agents, and competition for site resources from neighboring trees and/or other vegetation types [73]. In our case, one of

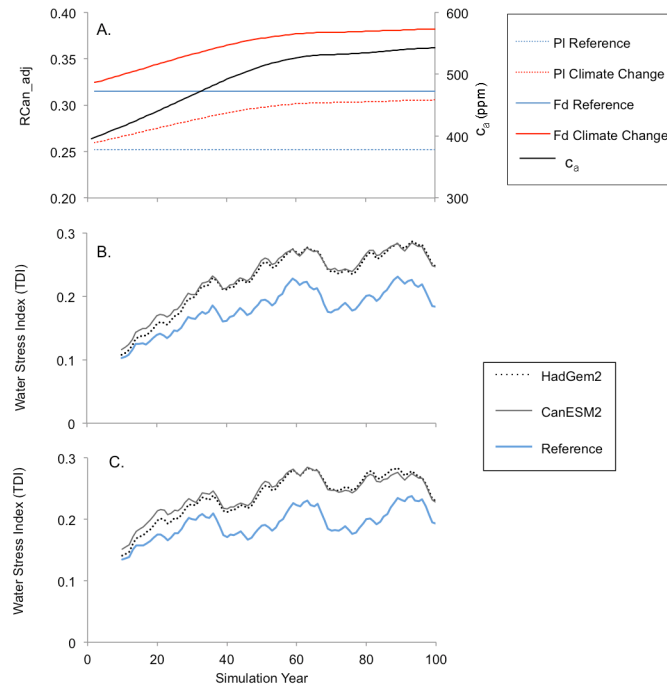

**Fig 11. Simulated effect of  $c_a$  on canopy resistance (A) and of climate change on tree water stress (B-C).** (A) Projected atmospheric  $[CO_2]$  ( $c_a$ ) for the climate change scenarios is based on the RCP 4.5 emissions scenario while reference scenario levels were constrained at 2005 values (380 ppm). The impact of  $c_a$  on canopy resistance ( $R_{Can,adj}$ ) is shown for both species and for both climate scenarios (see Eq 3). Lower panels show simulated water stress for newly planted stands of (B) Douglas-fir and (C) lodgepole pine. Water stress results represent the 10-year running averages of annual transpiration deficit index (TDI) values.

doi:10.1371/journal.pone.0135034.g011

the two plots with lower  $R^2$  values (Douglas-fir, plot #9; see Table 2) displayed unusual patterns whereby ring widths declined to near zero for a three-year period before returning to ‘normal’ levels (data not shown). The other Douglas-fir plots showed no such pattern suggesting that the decline was not climate related. Abrupt disruption and subsequent recovery in tree radial growth is indicative of insect attack. In Douglas-fir that might be from budworm or bark beetle [78]. Regardless of its source, the ring pattern was sufficiently skewed that it effectively obscured the climate signal.

#### 4.2. Effects of climate change on productivity and mortality

FORECAST Climate predicted an overall increases in annual growth rates under future climate conditions in both Douglas-fir and lodgepole pine (Figs 10 and 12). An increase in growing season length was the dominant factor in this regard and served to counteract an increase in the frequency and intensity of summer moisture stress, the latter of which represented a downward pressure on growth (Fig 11). Summer moisture stress trended upwards under climate change despite simulated increases in canopy resistance associated with elevated atmospheric  $CO_2$  concentrations (see Fig 11). [23] also reported an antagonistic effect of growing season length and moisture stress on forest productivity in the boreal forest. [79] found that Douglas-fir growth rates in warm-dry regions correlated well with annual precipitation while growth in populations from cooler and wetter regions was better correlated with temperature and other climatic variables. Summer moisture deficit was the key climatic factor limiting interior Douglas-fir growth rates in montane ecosystems in the northwestern US [77]. In the Cascade Range,

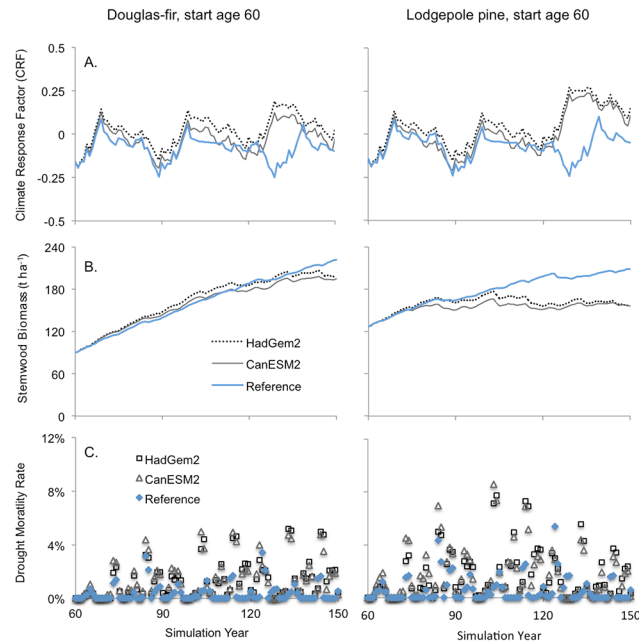

**Fig 12. The impact of climate change for on: (A) growth response (CRF), (B) stemwood biomass, and (C) drought-related mortality.** Simulation results for established (60 years old) stands of Douglas-fir are shown on the left and for lodgepole pine on the right. Climate change simulation was initiated at year 60 of the simulation. Lines represent 10-year running averages of annual values. A CRF value near zero indicates that the simulated climate year was similar to the historical average year.

doi:10.1371/journal.pone.0135034.g012

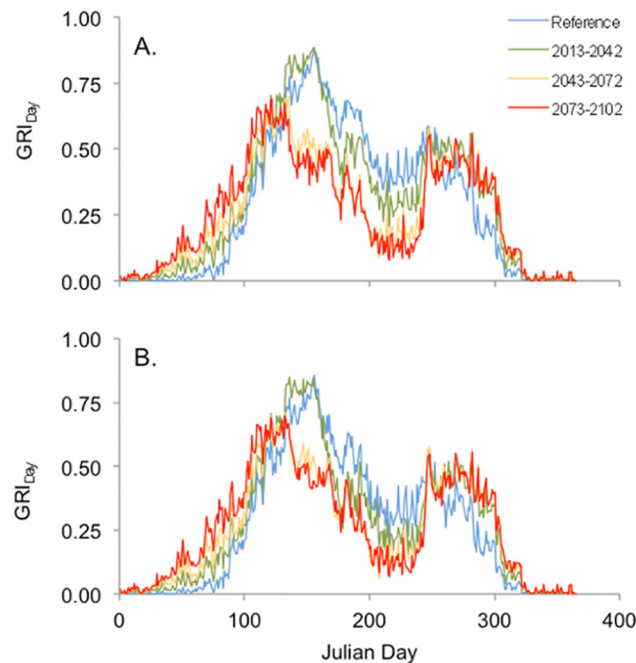

**Fig 13. Simulated impact of climate change on  $GRI_{Day}$  for Douglas-fir (A) and lodgepole pine (B).** Results for mean daily growth response index ( $GRI_{Day}$ ) are shown for newly planted stands and reflect data from the 30-year historical time period (reference), and three sequential 30-year future climate periods (2013–2042, 2043–2072, and 2073–2102) based upon the CanESM2 climate scenario.

doi:10.1371/journal.pone.0135034.g013

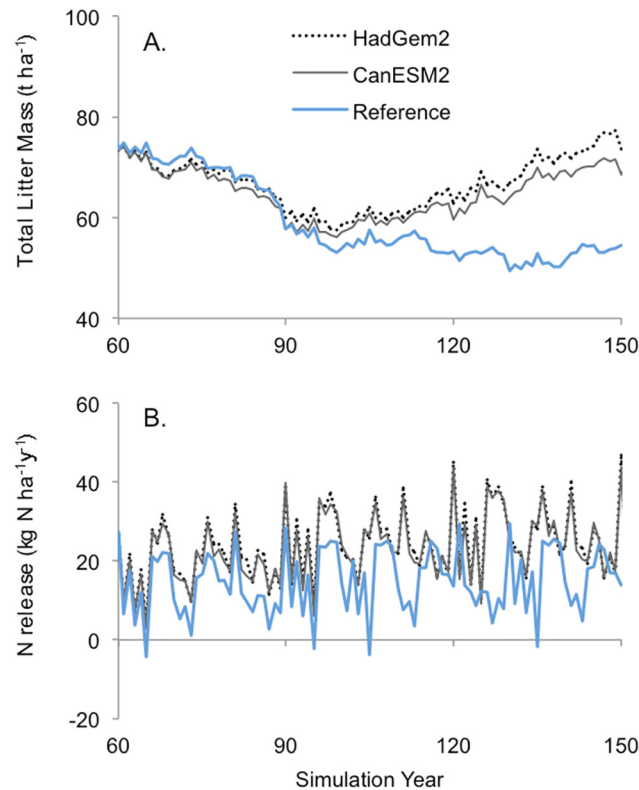

**Fig 14. Simulated impact of climate change on (A) total litter mass, and (B) net N release.** Results are shown for established (60 years old at the start of the climate change simulation) Douglas-fir stands.

doi:10.1371/journal.pone.0135034.g014

Washington, USA, [80] observed that growing season precipitation was the climate variable most strongly correlated with growth rates in mid-elevation lodgepole pine stands, indicating that summer water stress was a key limiting factor. They noted that temperature-regulated growing season length was the most important factor influencing growth rates in high elevation stands.

Higher drought-related mortality was predicted by FORECAST Climate in all climate change scenarios. This resulted in lower biomass production except for newly planted Douglas-fir stands. Established stands were vulnerable to the warmer and drier climate conditions due to a high leaf area. This is because older stands originated and developed under historical climate conditions, which can support a greater leaf area. The latter, however, is poorly adapted to an increasingly water-limited future environment. High evapotranspirational demand in older stands thus triggered widespread mortality during drought and a significant loss of live biomass. Although newly planted stands also incurred elevated mortality, the impact on long-term productivity was relatively low and surviving trees developed canopies with a lower leaf area. Finally, it should be noted that the intensity of predicted water stress declined after a mortality event. This was because mortality reduced stand leaf area (data not shown) resulting in a lower canopy water demand.

Evidence of increased drought-related mortality has been documented in forest ecosystems around the world [5, 81, 14]. Moreover, [82] observed widespread growth decline despite increases in water use efficiency in temperate and boreal forests in a study combining standard dendrochronological techniques with isotopic analysis. The complex physiological response of vegetation to water stress, however, has made it difficult to represent accurately within forest

ecosystem models [78]. Prolonged moisture stress increases mortality generally [5, 83] and both hydraulic failure and carbon starvation have been implicated as direct causal factors [84, 51]. Trees suffering from water stress are also more vulnerable to abiotic and biotic disturbance, including fire and insect attack [6, 83]. The water-stress mortality function employed in FORECAST Climate was designed to encapsulate both the direct and indirect aspects of drought-related mortality. It can be parameterized through an iterative process whereby modeled mortality derived using historical reference climate data is adjusted to achieve a reasonable match to measured rates.

It should be noted that the projections of the impact of climate change on long-term growth and productivity in these ecosystems do not include any impacts from extreme climate events nor the effect of climate on population dynamics of natural disturbance agents. Both of these factors have the potential to substantially impact forest productivity as the climate continues to change.

### 4.3. Climate effects on decomposition and nutrient cycling

FORECAST Climate predicted a net increase in mass loss associated with litter decomposition over most years in the climate change scenarios and there was an increase in simulated litter mass over the long-term (Fig 14A). The latter was a result of the higher mortality rates that occurred under climate change relative to historical conditions (see Figs 10C and 12C). Though warmer temperatures had a positive impact on decomposition rates there were periods when litter water content was low, which exerted a downward pressure on rates. Nevertheless, the net increase in decomposition led to an associated increase in N mineralization and thus a positive benefit to tree productivity. [11] provided evidence that soil warming leads to pronounced increases in litter mass loss and net N mineralization rates. In an experimental manipulation of soil warming over 7-years, [85] showed enhanced biomass production relative to controls, which they attributed largely to increased N availability. The representation of such feedback loops in models is thus paramount to improving their capability to capture climate change impacts on forest growth and development.

### 4.4. Hybrid modelling approach

FORECAST Climate employs a series of climate response functions to represent the impact of temperature and moisture stress on plant growth. The benefits of this approach are: 1) it represents a relatively simple and transparent approach to predicting the independent and combined effects of temperature and moisture stress on growth, 2) the shape of the response functions can be easily established and evaluated empirically, 3) it provides a convenient means of summarizing daily responses into annual indices, and 4) is easily calibrated using historical reference climate data. Further potential improvements to the model include a representation of the phenological responses of plants to climate, such as bud break or the onset of dormancy, and frost events.

## Supporting Information

**S1 File. A detailed description of the ForWaDy model, including key equations, algorithms, and references are provided within.**

(PDF)

## Acknowledgments

We would like to thank Kathy Lewis for her assistance with the tree ring analysis conducted at the University of Northern British Columbia. We would also like to thank Hamish Kimmins for his guidance and inspiration.

## Author Contributions

Conceived and designed the experiments: BS CW KS. Performed the experiments: BS. Analyzed the data: BS CW. Contributed reagents/materials/analysis tools: KS. Wrote the paper: BS CW KS. Code development: KS BS.

## References

1. Dale VH, Joyce LA, McNulty S, Neilson RP, Ayres MP, Flannigan MD, et al. Climate change and forest disturbances. *BioScience*. 2001; 51: 723–734.
2. Bond-Lamberty B, Peckham SD, Ahl DE, Gower ST. Fire as the dominant driver of central Canadian boreal forest carbon balance. *Nature*. 2007; 450: 89–92. PMID: [17972883](#)
3. Raffa KF, Aukema BH, Bentz BJ, Carroll AL, Hicke JA, Turner MG, et al. Cross-scale drivers of natural disturbances prone to anthropogenic amplification: the dynamics of bark beetle eruptions. *Bioscience*. 2008; 58: 501–517.
4. Kurz WA, Dymond CC, Stinson G, Rampley GJ, Neilson ET, Carroll AL, et al. Mountain pine beetle and forest carbon feedback to climate change. *Nature*. 2008; 452: 987–990. doi: [10.1038/nature06777](#) PMID: [18432244](#)
5. Allen CD, Macalady AK, Chenchouni H, Bachele D, McDowell N, Vennetier M, et al. A global overview of drought and heat-induced tree mortality reveals emerging climate change risks for forests. *For Ecol Manage*. 2010; 259: 660–684.
6. Van Mantgem PJ, Stephenson NL, Byrne JC, Daniels LD, Franklin JF, Ful E PZ, et al. Widespread increase of tree mortality rates in the western United States. *Science*. 2009; 323: 521–524. doi: [10.1126/science.1165000](#) PMID: [19164752](#)
7. Barber VA, Juday GP, Finney BP. Reduced growth of Alaskan white spruce in the twentieth century. *Nature* 2000; 405: 668–673. PMID: [10864320](#)
8. Zhao M, Running SW. Drought-induced reduction in global terrestrial net primary production from 2000 through 2009. *Science*. 2010; 329: 940–943. doi: [10.1126/science.1192666](#) PMID: [20724633](#)
9. Nemani RR, Keeling CD, Hashimoto H, Jolly WM, Piper SC, Tucker CJ, et al. Climate driven increases in global terrestrial net primary production from 1982 to 1999. *Science*. 2003; 300: 1560–1563. PMID: [12791990](#)
10. McMahon SM, Parker GG, Miller DR. Evidence for a recent increase in forest growth. *Proc Natl Acad Sci USA*. 2010; 107: E86–E87 101073/pnas1002725107 PMID: [20439700](#). doi: [10.1073/pnas.1002725107](#)
11. Chung H, Muraoka H, Nakamura M, Han S, Muller O, So Y. Experimental warming studies on tree species and forest ecosystems: a literature review. *J Plant Res*. 2013; 126: 447–460. doi: [10.1007/s10265-013-0565-3](#) PMID: [23689840](#)
12. Trofymow JA, Moore TR, Titus B, Prescott C, Morrison I, Siltanen M, et al. Rates of litter decomposition over six years in Canadian forests: Influence of litter quality and climate. *Can J For Res*. 2002; 32: 789–804.
13. Prescott CE, Blevins LL, Staley CL. Litter decomposition in BC forests: Controlling factors and influences of forestry activities. *BC J Ecosys Manage*. 2004; 5: 30–43.
14. Wang W, Peng C, Kneeshaw DD, Larocque GR, Luo Z. Drought-induced tree mortality: ecological consequences, causes and modeling. *Environ Rev*. 2012; 20: 109–121.
15. Quillet A, Peng C, Garneau M. Toward dynamic global vegetation models for simulating vegetation-climate interactions and feedbacks: recent developments, limitations, and future challenge. *Environ Rev*. 2010; 18: 333–353.
16. Powell TL, Galbraith DR, Christoffersen BO, Harper A, Imbuzeiro HMA, Rowland L, et al. Confronting model predictions of carbon fluxes with measurements of Amazon forests subjected to experimental drought. *New Phytol*. 2013; 200: 350–364. doi: [10.1111/nph.12390](#) PMID: [23844931](#)

17. Crookston NL, Rehfeldt GE, Dixon GE, Weiskittel AR. Addressing climate change in the forest vegetation simulator to assess impacts on landscape forest dynamics. *For Ecol Manage.* 2010; 260: 1198–1211.
18. Monserud RA, Yang Y, Huang S, Tchebakova N. Potential change in lodgepole pine site index and distribution under climatic change in Alberta. *Can J For Res.* 2008; 38: 343–352.
19. Grant RF, Zhang Y, Yuan F, Wang S, Hanson PJ, Gaumont-Guaye D, et al. Intercomparison of techniques to model water stress effects on CO<sub>2</sub> and energy exchange in temperate and boreal deciduous forests. *Ecol Modell.* 2006; 196: 289–312.
20. Battaglia M, Sands P, White D, Mummery D. A linked carbon, water and nitrogen model of forest growth for silvicultural decision support. *For Ecol Manage.* 2004; 193: 251–282.
21. Landsberg JJ, Waring RH. A generalized model of forest productivity using simplified concepts of radiation-use efficiency, carbon balance, and partitioning. *For Ecol Manage.* 1997; 95: 209–228.
22. Kimmins JP, Blanco JA, Seely B, Welham C, Scoullar K. *Forecasting forest futures: a hybrid modelling approach to the assessment of sustainability of forest ecosystems and their values.* London: Earthscan Ltd.; 2010.
23. Girardin MP, Raulier F, Bernier P, Tardif J. Response of tree growth to a changing climate in boreal central Canada: A comparison of empirical, process-based, and hybrid modelling approaches. *Ecol Modell.* 2008; 213: 209–228.
24. Spittlehouse DL, Stewart RB. Adaptation to climate change in forest management. *BC J Ecosys Manage.* 2003; 4: 1–7.
25. Millar CI, Stephenson NL, Stephens SL. Climate change and forests of the future: managing in the face of uncertainty. *Ecol Appl.* 2007; 17: 2145–2151. PMID: [18213958](#)
26. Kimmins JP, Mailly D, Seely B. Modelling forest ecosystem net primary production: the hybrid simulation approach used in FORECAST. *Ecol Modell.* 1999; 122: 195–224.
27. Bi J, Blanco JA, Kimmins JP, Ding Y, Seely B, Welham C. Yield decline in Chinese Fir plantations: A simulation investigation with implications for model complexity. *Can J For Res.* 2007; 37: 1615–1630.
28. Blanco JA, Seely B, Welham C, Kimmins JP, Seebacher TM. Testing the performance of FORECAST, a forest ecosystem model, against 29 years of field data in a *Pseudotsuga menziesii* plantation. *Can J For Res.* 2007; 37: 1808–1820.
29. Seely B, Hawkins C, Blanco JA, Welham C, Kimmins JP. Evaluation of a mechanistic approach to mixedwood modelling. *For Chron.* 2008; 84: 181–193.
30. Seely B, Welham C, Blanco JA. Towards the application of soil organic matter as an indicator of forest ecosystem productivity: Deriving thresholds, developing monitoring systems, and evaluating practices. *Ecol Indic.* 2010; 10: 999–1008.
31. IPCC. Summary for Policymakers In: Stocker TF, Qin D, Plattner G-K, Tignor M, Allen SK, Boschung J, et al., editors. *Climate Change 2013: The Physical Science Basis Contribution of Working Group I to the Fifth Assessment Report of the Intergovernmental Panel on Climate Change.* New York: Cambridge University Press; 2013.
32. Seely B, Arp P, Kimmins JP. A forest hydrology submodel for simulating the effect of management and climate change on stand water stress. In: Amaro A and Tomé M, editors. *Proceedings of Empirical and Process-based models for forest, tree and stand growth simulation Oeiras, Portugal, 21–27, September 1997, Lisboa: Edições Salamandra; 1997. pp. 463–477.*
33. Titus BD, Prescott CE, Maynard DG, Mitchell AK, Bradley RL, Feller MC, et al. Post-harvest nitrogen cycling in clearcut and alternative silvicultural systems in a montane forest in coastal British Columbia. *For Chron.* 2006; 82: 844–859.
34. Dordel J, Seely B, Simard S. Relationships between simulated water stress and mortality and growth rates in underplanted *Toona ciliata* Roem in subtropical Argentinean plantations. *Ecol Modell.* 2011; 222: 3226–3235.
35. Priestley CHB, Taylor RJ. On the assessment of surface heat flux and evaporation using large-scale parameters. *Monthly Weather Review.* 1972; 100: 81–92.
36. Stagnitti F, Parlange JY, Rose CW. Hydrology of a small wet catchment. *Hydrol Process.* 1989; 3: 137–150.
37. Flint AL, Childs SW. Use of the Priestly-Taylor evaporation equation for soil water limited conditions in a small forest clearcut *Agric For Meteorol.* 1991; 56: 247–260.
38. Sumner DM, Jacobs JM. Utility of Penman–Monteith, Priestley–Taylor, reference evapotranspiration, and pan evaporation methods to estimate pasture evapotranspiration. *J Hydrol.* 2005; 308: 81–104.
39. Rao LY, Sun G, Ford CR, Vose JM. Modeling potential evapotranspiration of two forested watersheds in the southern Appalachians. *Biol Eng Trans.* 2011; 54: 2067–2078.

40. Ainsworth EA, Rogers A. The response of photosynthesis and stomatal conductance to rising [CO<sub>2</sub>]: mechanisms and environmental interactions. *Plant Cell Environ.* 2007; 30: 258–270. PMID: [17263773](#)
41. Keenan TF, Hollinger DY, Bohrer G, Dragoni D, Munger JW, Schmid HP, et al. Increase in forest water-use efficiency as atmospheric carbon dioxide concentrations rise. *Nature.* 2013; 499: 324–327. doi: [10.1038/nature12291](#) PMID: [23842499](#)
42. Battipaglia G, Saurer M, Cherubini P, Calfapietra C, McCarthy HR, Norby RJ, et al. Elevated CO<sub>2</sub> increases tree-level intrinsic water use efficiency: insights from carbon and oxygen isotope analyses in tree rings across three forest FACE sites. *New Phytol.* 2013; 197: 544–554. doi: [10.1111/nph.12044](#) PMID: [23215904](#)
43. Silva LCR, Anand M. Probing for the influence of atmospheric CO<sub>2</sub> and climate change on forest ecosystems across biomes. *Glob Ecol Biogeogr.* 2013; 22: 83–92.
44. Franks PJ, Adams MA, Amthor JS, Barbour MM, Berry JA, Ellsworth DS, et al. Sensitivity of plants to changing atmospheric CO<sub>2</sub> concentration: from the geological past to the next century. *New Phytol.* 2013; 197: 1077–1094. doi: [10.1111/nph.12104](#) PMID: [23346950](#)
45. Medlyn BE, Dursma RA, Zeppel MJB. Forest productivity under climate change: a checklist for evaluating model studies WIREs. *Clim Change.* 2011; 2: 332–355.
46. Eamus D, Jarvis PG. The direct effects of increase in the global atmospheric CO<sub>2</sub> concentration on natural and commercial temperate trees and forests. *Adv Ecol Res.* 1989; 19: 1–55.
47. Norby RJ, Wullschlegel SD, Gunderson CA, Johnson DW, Ceulemans R. Tree responses to rising CO<sub>2</sub> in field experiments: implications for the future forest. *Plant Cell Environ.* 1999; 22: 683–714.
48. Körner C, Asshoff R, Bignucolo O, Hättenschwiler H, Keel SG, Peláez-Riedl S, et al. Carbon flux and growth in mature deciduous forest trees exposed to elevated CO<sub>2</sub>. *Science.* 2005; 309: 1360–1362. PMID: [16123297](#)
49. Girardin MP, Bernier PY, Raulier F, Tardif JC, Conciatori F, Guo XJ. Testing for a CO<sub>2</sub> fertilization effect on growth of Canadian Boreal forests. *J of Geophys Res.* 2011; 116: G01012, 101029/2010JG001287.
50. Barron-Gafford GA, Scott RL, Jenerette GD, Hamerlynck PE, Huxman TE. Temperature and precipitation controls over leaf- and ecosystem-level CO<sub>2</sub> flux along a woody plant encroachment gradient. *Glob Chang Biol.* 2012; 18: 1389–1400.
51. McDowell N, Pockman WT, Allen CD, Breshears DD, Cobb N, Kolb T, et al. Mechanisms of plant survival and mortality during drought: why do some plants survive while others succumb to drought? *New Phytol.* 2008; 178: 719–739. doi: [10.1111/j.1469-8137.2008.02436.x](#) PMID: [18422905](#)
52. Gholz HL, Wedin DA, Smitherman SM, Harmon ME, Parton WJ. Long-term dynamics of pine and hardwood litter in contrasting environments: toward a global model of decomposition. *Glob Chang Biol.* 2000; 6: 751–765.
53. Chen H, Harmon ME, Tian H. Effects of global change on litter decomposition in terrestrial ecosystems. *Acta Ecologica Sinica.* 2001; 21: 1549–1563.
54. Zhou G, Guan L, Wei X, Tang X, Liu S, Liu J, et al. Factors influencing leaf litter decomposition: an inter-site decomposition experiment across China. *Plant Soil.* 2008; 311: 61–72.
55. Daniels L, Maertens TB, Stan AB, McCloskey SPJ, Cochrane JD, Gray RW. Direct and indirect impacts of climate change on forests: three case studies from British Columbia. *Can J Plant Pathol.* 2011; 33: 108–116.
56. Hogg EH, Brandt JP, Michaelian M. Impacts of regional drought on the productivity, dieback, and biomass of western Canadian aspen forests. *Can J For Res.* 2008; 38: 1373–1384.
57. MacKinnon A, Meidinger D, Klinka K. Use of the biogeoclimatic ecosystem classification system in British Columbia. *For Chron.* 1992; 68: 100–120.
58. Stokes M, Smiley T. An introduction to tree-ring dating. Chicago: University of Chicago Press; 1968.
59. Cook ER, Krusic PJ. ARSTAN v 41d: A tree-ring standardization program based on de-trending and autoregressive time series modeling, with interactive graphics. New York: Tree-Ring Laboratory, Lamont-Doherty Earth Observatory of Columbia University; 2005.
60. Hogg EH, Barr AG, Black TA. A simple soil moisture index for representing multi-year drought impacts on aspen productivity in the western Canadian interior. *Agric For Meteorol.* 2013; 178–179: 173–182.
61. Kozlowski TT, Pallardy SG. Acclimation and adaptive responses of woody plants to environmental stresses. *Bot Rev* 2002; 68: 270–334.
62. Seely B, Kimmin JP, Welham C, Scoullar KA. Ecosystem management models: defining stand-level sustainability, exploring stand-level stewardship. *J For.* 1999; 97: 4–10.
63. Nelson H, Zielke K, Bancroft B, Brown C, Cohen S, Davis R, et al. Validating Impacts, Exploring Vulnerabilities, and Developing Robust Adaptive Strategies under the Kamloops Future Forest Strategy. Final



Report. 2011. Available: [http://www.symmetree.ca/ftp/Public/Climate%20Change/Kamloops%20TSA/K2%20FFESC%20Report%202011\\_Jan%2031-12%20FINAL.pdf](http://www.symmetree.ca/ftp/Public/Climate%20Change/Kamloops%20TSA/K2%20FFESC%20Report%202011_Jan%2031-12%20FINAL.pdf).

64. Spittlehouse DL, Black TA. A growing season water balance model applied to two Douglas-fir stands. *Water Resour Res.* 1981; 17: 1651–1656.
65. Andrews SF, Flanagan LB, Sharp EJ, Cai T. Variation in water potential, hydraulic characteristics and water source use in montane Douglas-fir and lodgepole pine trees in southwestern Alberta and consequences for seasonal changes in photosynthetic capacity. *Tree Physiol.* 2012; 32: 146–160. doi: [10.1093/treephys/tpr136](https://doi.org/10.1093/treephys/tpr136) PMID: [22318220](https://pubmed.ncbi.nlm.nih.gov/22318220/)
66. Warren JM, Meinzer FC, Brooks JR, Domec JC. Vertical stratification of soil water storage and release dynamics in Pacific Northwest coniferous forests. *Agric For Meteorol.* 2005; 130: 39–58.
67. Lewis JD, Lucash M, Olszyk D, Tingey DT. Seasonal patterns of photosynthesis in Douglas fir seedlings during the third and fourth year of exposure to elevated CO<sub>2</sub> and temperature. *Plant Cell Environ.* 2001; 24: 539–548.
68. Case MJ, Peterson DL. Fine-scale variation in growth relationships of Douglas-fir, North Cascade Range, Washington. *Can J For Res.* 2005; 35:2743–2755.
69. Dykstra GF. Photosynthesis and Carbon dioxide transfer resistance of Lodgepole pine seedlings in relation to irradiance, temperature and water potential. *Can J For Res.* 1974; 4: 201–206.
70. Coops NC, Waring RH. A process-based approach to estimate lodgepole pine (*Pinus contorta* Dougl.) distribution in the Pacific Northwest under climate change. *Clim Change.* 2010; 105: 313–328.
71. Meinshausen M, Smith SJ, Calvin KV, Daniel JS, Kainuma JF, Lamarque M, et al. The RCP greenhouse gas concentrations and their extension from 1765 to 2300. *Clim Change.* 2011; 109: 213–241.
72. Boisvenue C, Running S. Impacts of climate change on natural forest productivity—evidence since the middle of the 20th century. *Glob Chang Biol.* 2006; 12: 862–882.
73. Fritts HC. *Tree rings and climate.* London: Academic Press; 1976.
74. Anchukaitis KJ, Evans MN, Kaplan A, Vaganov EA, Hughes MK, Grissino-Mayer HD, et al. Forward modeling of regional scale tree-ring patterns in the southeastern United States and the recent influence of summer drought. *Geophys Res Lett.* 2006; 33: L04705.
75. Lara W, Bravo F, Maguire DA. Modeling patterns between drought and tree biomass growth from dendrochronological data: A multilevel approach. *Agric For Meteorol.* 178–179: 140–151.
76. Pederson GT, Gray ST, Fagre DB, Graumlich LJ. Long-duration drought variability and impacts on ecosystem services: A case study from Glacier National Park, Montana. *Earth Inter.* 2006; 10: 2–28.
77. Littell JS, Peterson DL, Tjoelker M. Douglas-fir growth in mountain ecosystems: water limits tree growth from stand to region. *Ecol Monogr.* 2008; 78: 349–368.
78. Hadley KS, Veblen TT. Stand response to western spruce budworm and Douglas-fir bark beetle outbreaks, Colorado Front Range. *Can J For Res.* 1993; 23: 479–493.
79. Griesbauer HP, Green DS. Regional and ecological patterns in interior Douglas-fir climate–growth relationships in British Columbia, Canada. *Can J For Res.* 40: 308–321.
80. Case MJ, Peterson DL. Growth-climate Relations of Lodgepole Pine in the North Cascades National Park, Washington. *Northwest Sci.* 2007; 81: 62–75.
81. Peng C, Ma Z, Lei X, Zhu Q, Chen H, Wang W, et al. A drought-induced pervasive increase in tree mortality across Canada's boreal forests *Nat Clim Chang.* 2011; 101038/NCLIMATE: 1293, 467–471.
82. Silva LCR, Anand M, Leithead MD. Recent widespread tree growth decline despite increasing atmospheric CO<sub>2</sub>. *PLoS ONE.* 2010; 5(7): e11543. doi: [10.1371/journal.pone.0011543](https://doi.org/10.1371/journal.pone.0011543) PMID: [20657763](https://pubmed.ncbi.nlm.nih.gov/20657763/)
83. O'Grady AP, Mitchell PJM, Pinkard EA, Tissue DT. Thirsty roots and hungry leaves: unravelling the roles of carbon and water dynamics in tree mortality. *New Phytol.* 2013; 200: 294–294. doi: [10.1111/nph.12451](https://doi.org/10.1111/nph.12451) PMID: [24050630](https://pubmed.ncbi.nlm.nih.gov/24050630/)
84. Xu C, McDowell NG, Sevanto S, Fisher RA. Our limited ability to predict vegetation dynamics under water stress. *New Phytol.* 2013; 200: 298–300. doi: [10.1111/nph.12450](https://doi.org/10.1111/nph.12450) PMID: [24050631](https://pubmed.ncbi.nlm.nih.gov/24050631/)
85. Melillo JM, Butler S, Johnson J, Mohan J, Steudler P, Lux H, et al. Soil warming, carbon–nitrogen interactions, and forest carbon budgets. *Proc Natl Acad Sci USA.* 2011; 108: 9508–9512. doi: [10.1073/pnas.1018189108](https://doi.org/10.1073/pnas.1018189108) PMID: [21606374](https://pubmed.ncbi.nlm.nih.gov/21606374/)
